# Supplementary material for: Estimating micro area behavioural risk factor prevalence from large population-based surveys: a full Bayesian approach
Source: Springer Nature journal article supplement (doi:10.1186/s12889-016-3144-4), 2016-06-07
Supplement: MOESM4 [file 10244056]

**Additional File 4: Spatial Clustering of Behavioural Risk Factors for CCHS Respondents in the Erie-St. Clair Region**

| <b>Behavioural Risk Factor</b> | <b>Observed Number from CCHS</b> | <b>Expected Number</b> | <b>Observed/Expected</b> | <b>Relative Risk</b> | <b>p-value</b> | <b>Number of DAs</b> | <b>2006 DA population aged <math>\geq 12</math> years</b> | <b>Mean Prevalence Within Cluster: Model 1 (%)</b> | <b>Mean Prevalence Within Cluster: Model 2 (%)</b> |
|--------------------------------|----------------------------------|------------------------|--------------------------|----------------------|----------------|----------------------|-----------------------------------------------------------|----------------------------------------------------|----------------------------------------------------|
| <b>Current Smoking</b>         |                                  |                        |                          |                      |                |                      |                                                           |                                                    |                                                    |
| <u>Males</u>                   |                                  |                        |                          |                      |                |                      |                                                           |                                                    |                                                    |
| Sarnia                         | 147                              | 85.6                   | 1.70                     | 1.76                 | <0.001         | 39                   | 8 195                                                     | 37.7                                               | 35.7                                               |
| Windsor                        | 152                              | 97.5                   | 1.56                     | 1.61                 | <0.001         | 87                   | 18 617                                                    | 34.5                                               | 34.0                                               |
| Chatham                        | 106                              | 65.0                   | 1.67                     | 1.67                 | 0.002          | 38                   | 8 852                                                     | 32.7                                               | 32.8                                               |
| <u>Females</u>                 |                                  |                        |                          |                      |                |                      |                                                           |                                                    |                                                    |
| Sarnia                         | 188                              | 123.9                  | 1.52                     | 1.58                 | <0.001         | 64                   | 15 082                                                    | 28.1                                               | 27.8                                               |
| Windsor                        | 188                              | 129.0                  | 1.46                     | 1.51                 | 0.001          | 118                  | 25 557                                                    | 27.6                                               | 29.2                                               |
| <b>Excess Bodyweight</b>       |                                  |                        |                          |                      |                |                      |                                                           |                                                    |                                                    |
| <u>Males</u>                   |                                  |                        |                          |                      |                |                      |                                                           |                                                    |                                                    |
| Windsor                        | 453                              | 389.8                  | 1.16                     | 1.18                 | 0.01           | 129                  | 34 965                                                    | 64.4                                               | 64.6                                               |

Notes: The observed number within a cluster was the sum of CCHS respondents with the behavioural risk factor. The expected number within the cluster was determined from the Bernoulli likelihood function for binary outcomes under the null hypothesis of no variation in the risk factor prevalence inside and outside the cluster [54]. SaTScan provided a relative risk estimate, which was the ratio of the observed/expected value within the cluster divided by the observed/expected value for the area outside the cluster. DA-level population estimates were obtained from the 5-year age groups provided by the 2006 Census. Sixty percent of the 10-14 year old age group was used to obtain population counts for 12-15 year age group to correspond to the age groups included in the CCHS ( $\geq 12$  years). The mean modeled prevalence estimates were obtained from the post-stratified estimates for DAs within each cluster for models 1 and 2.

Abbreviations: CCHS = Canadian Community Health Survey; DA = Dissemination Area (from 2006 census);
